# Supplementary material for: Association between cannabis use and brain structure and function: an observational and Mendelian randomisation study
Source: HighWire-hosted journal article supplement (doi:10.1136/bmjment-2024-301065), 2024-10-01

## **Supplementary figures**

Table of Contents

|                                                                                                                                                   |           |
|---------------------------------------------------------------------------------------------------------------------------------------------------|-----------|
| <b>SFigure 1: Lifetime cannabis use in UK Biobank participants analysed. ....</b>                                                                 | <b>1</b>  |
| <b>SFigure 2: Flow chart of the participants included in the final analysis. ....</b>                                                             | <b>2</b>  |
| <b>SFigure 3a: Two-sample linear MR plot for the causal effect of Cannabis dependence or abuse/ Lifetime Cannabis use on brain measures .....</b> | <b>3</b>  |
| <b>SFigure 3b: Reverse two-sample linear MR plot for the causal effect of brain measures on Cannabis dependence or abuse .....</b>                | <b>10</b> |

**SFigure 1: Lifetime cannabis use in UK Biobank participants analysed.**

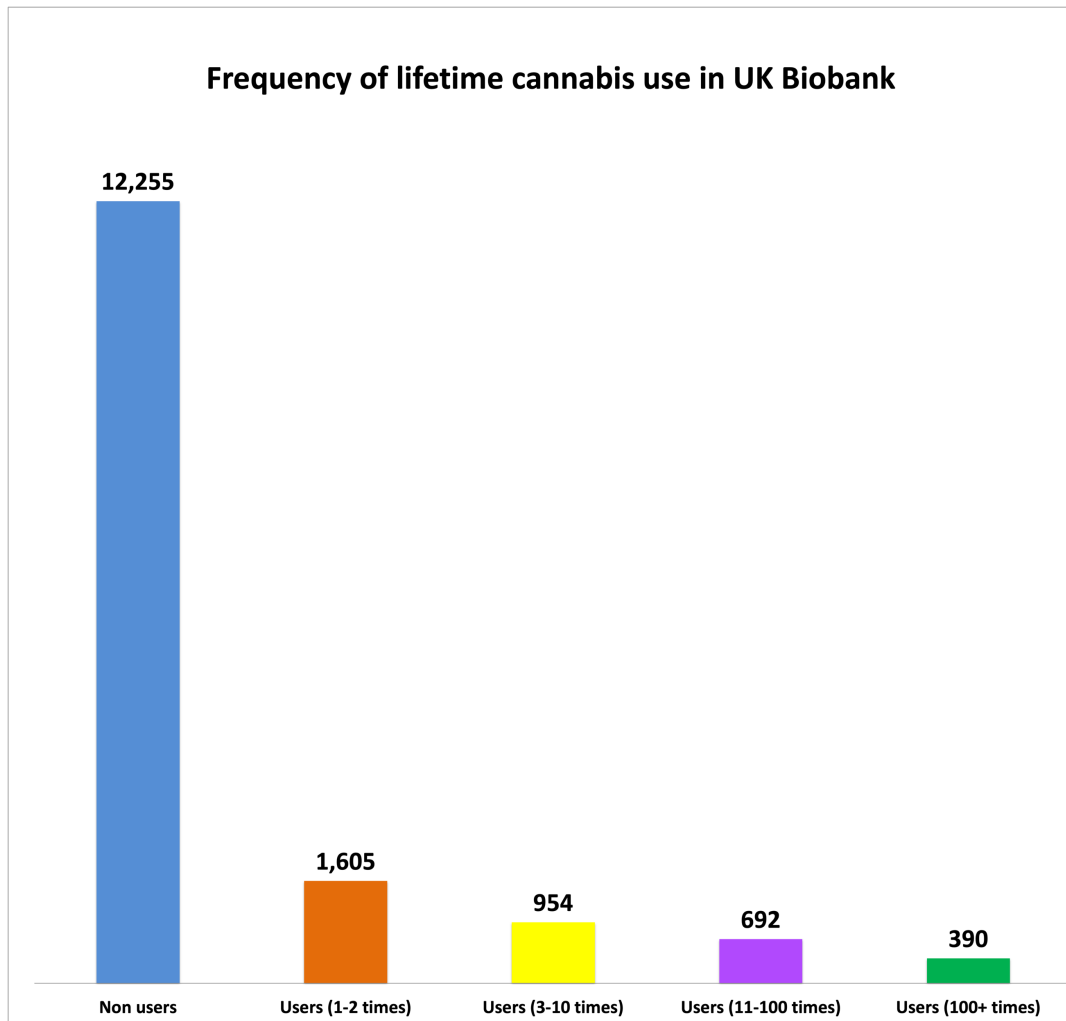

**SFigure 2: Flow chart of the participants included in the final analysis.**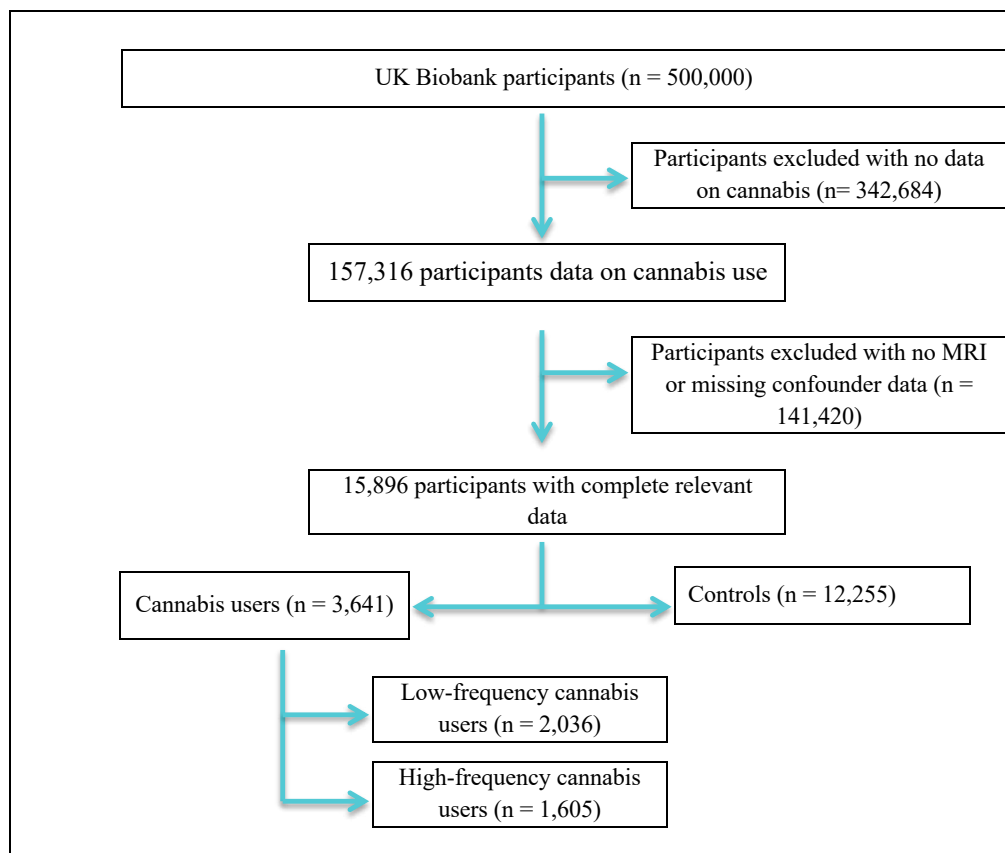

Low-frequency cannabis use defined as lifetime cannabis use of 1-10 times, and high-frequency cannabis use defined as lifetime cannabis use of 11-100+ times.

Abbreviations: MRI, magnetic resonance imaging.

### SFigure 3a: Two-sample linear MR plot for the causal effect of Cannabis dependence or abuse/ Lifetime Cannabis use on brain measures

#### Cannabis dependence or abuse and brain measures

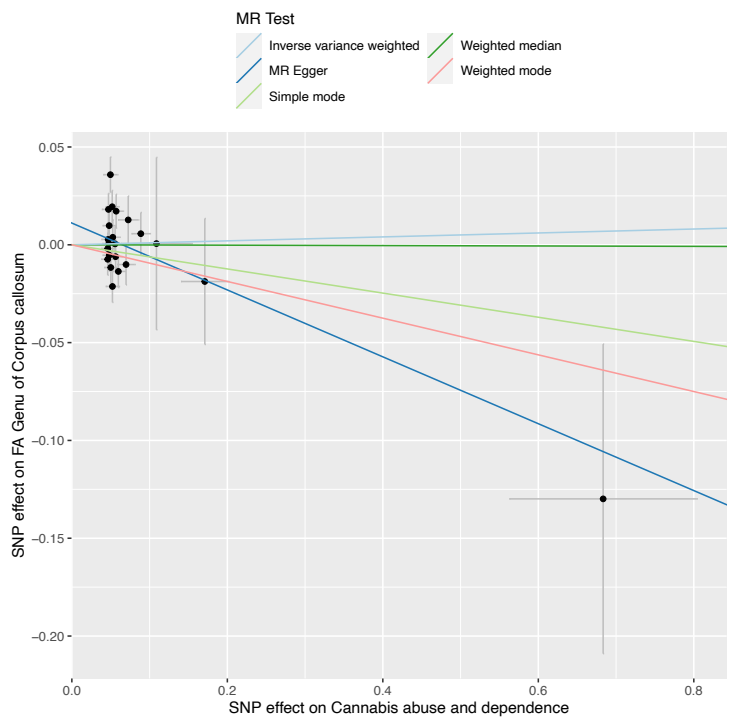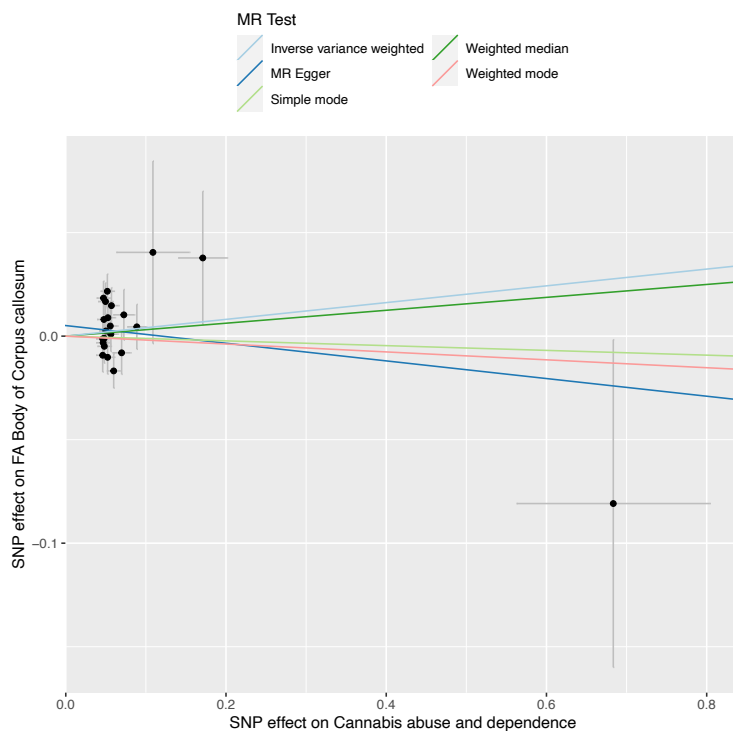

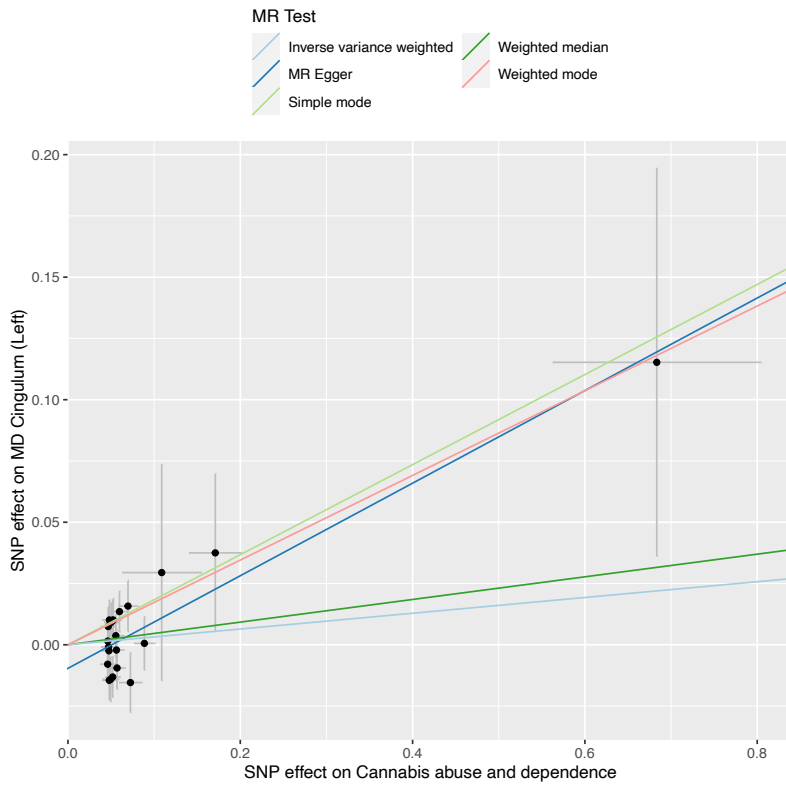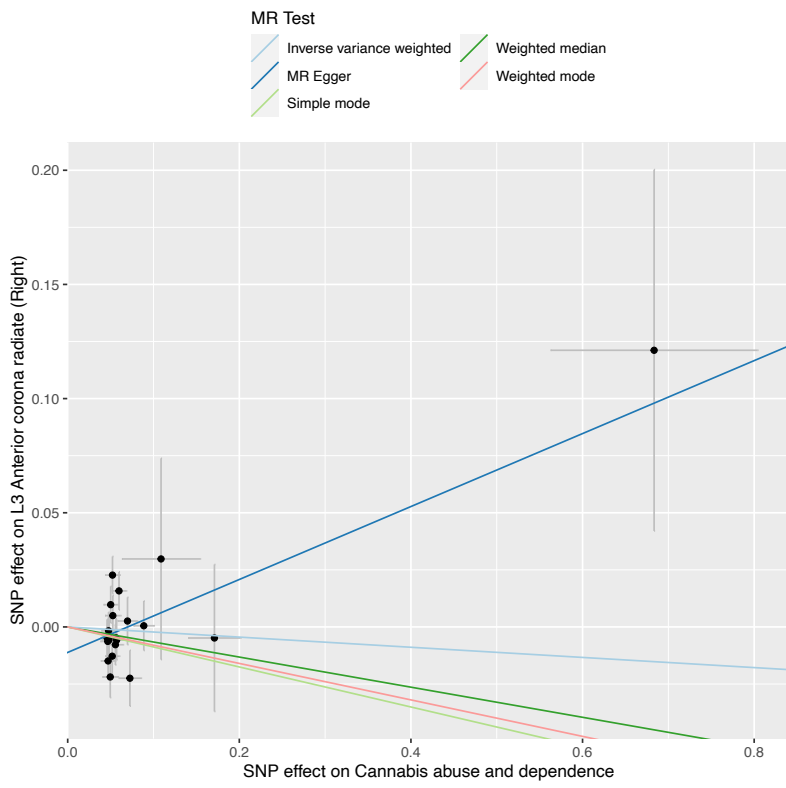

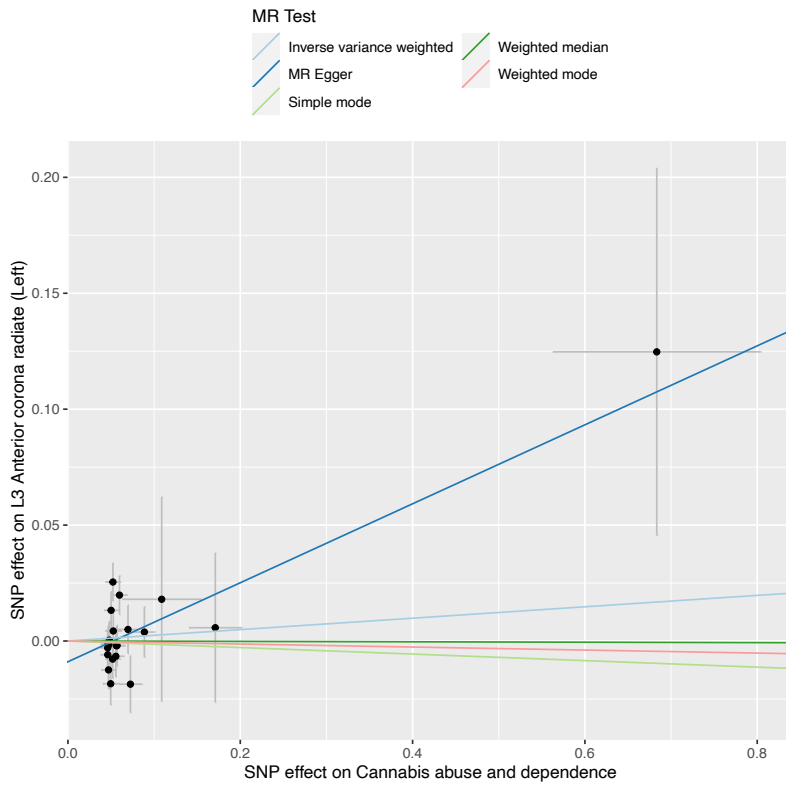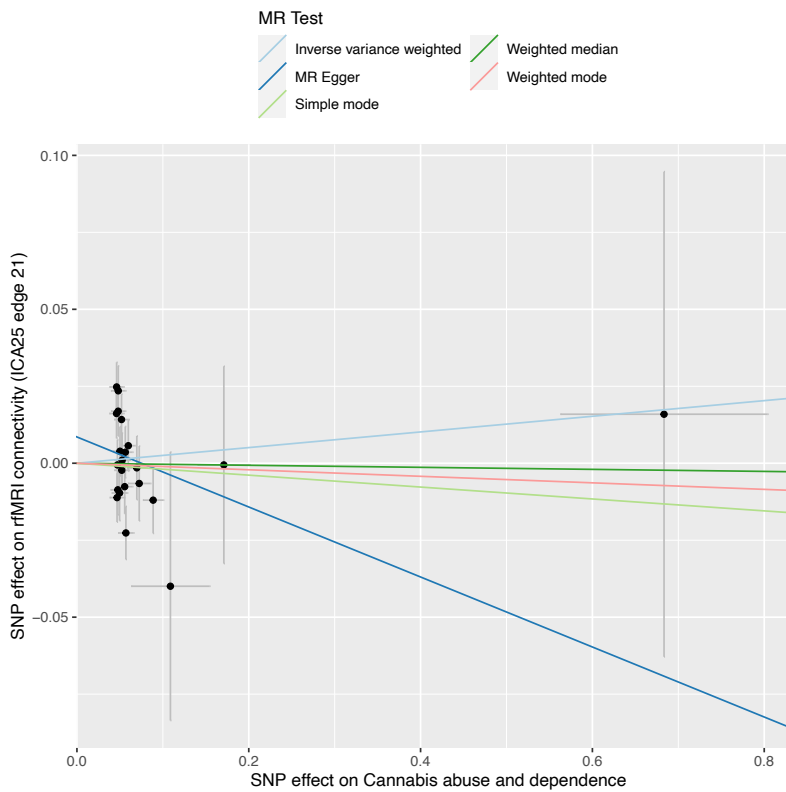

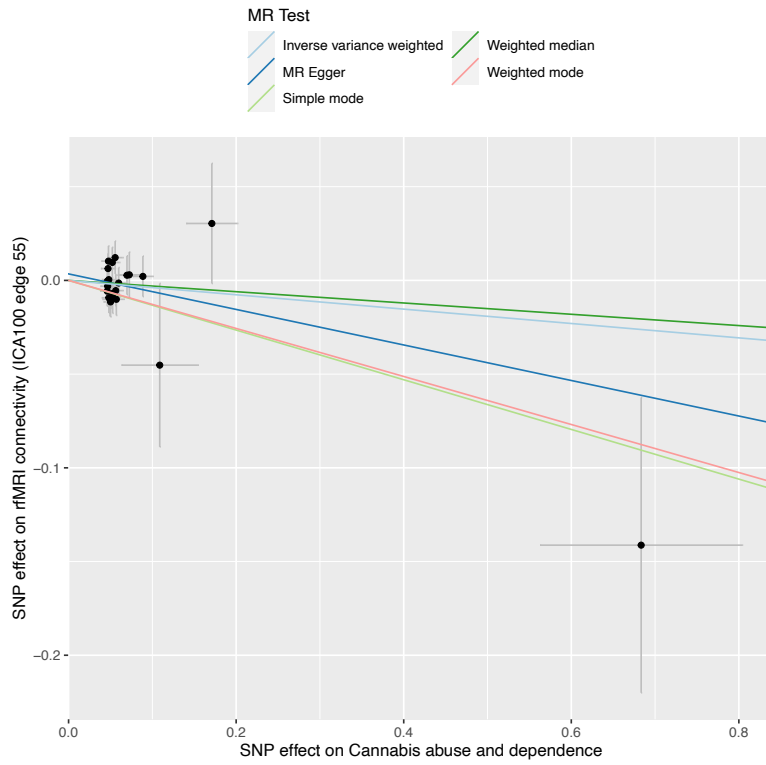

**Lifetime Cannabis use and brain IDPs**

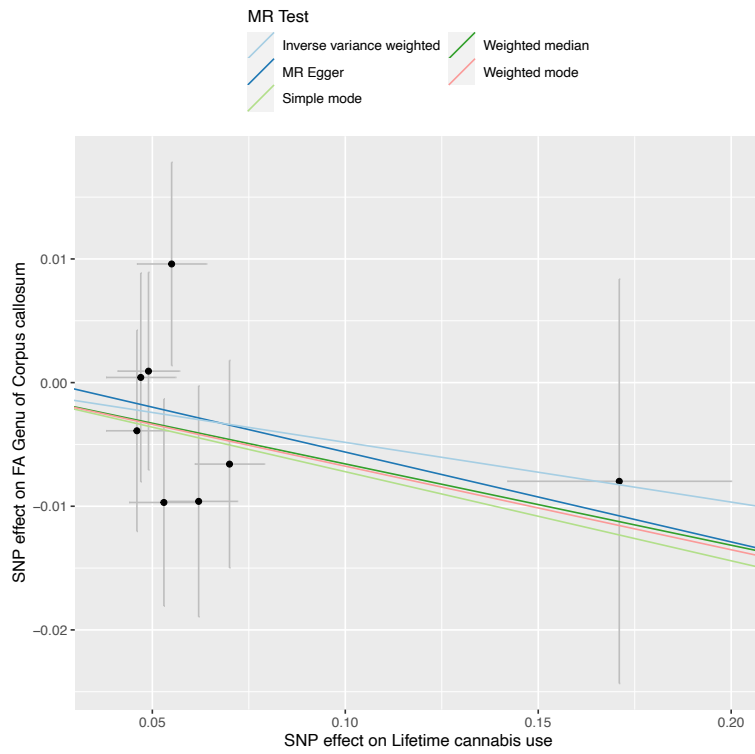

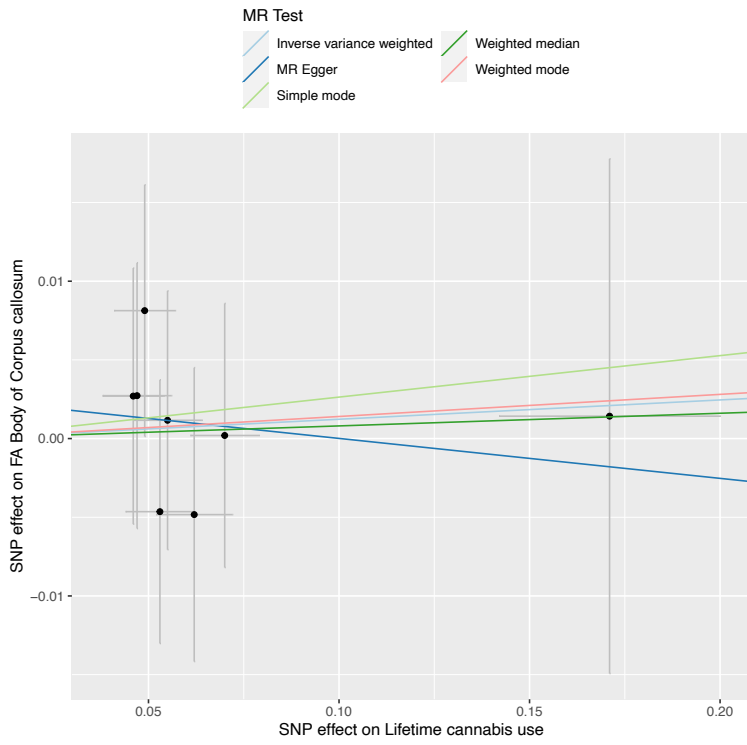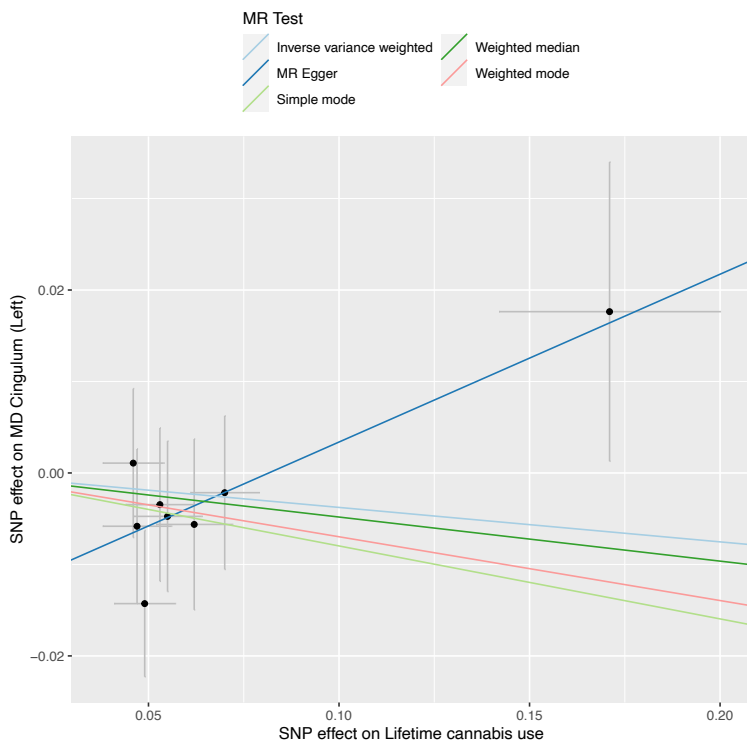

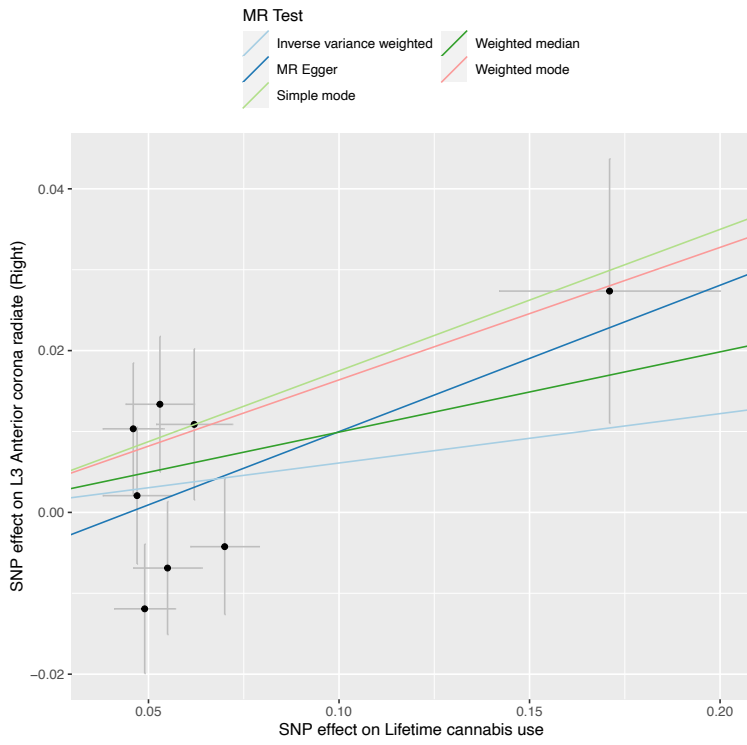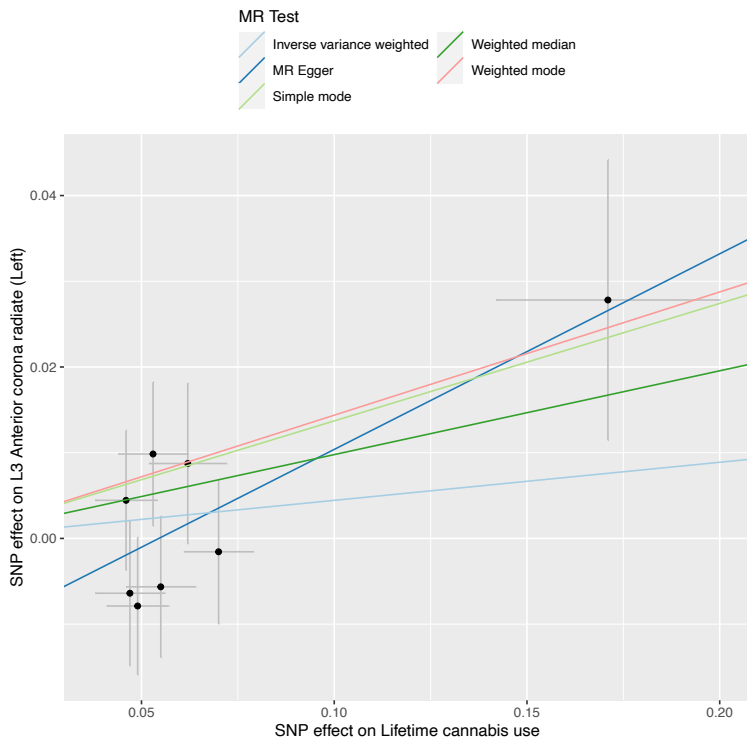



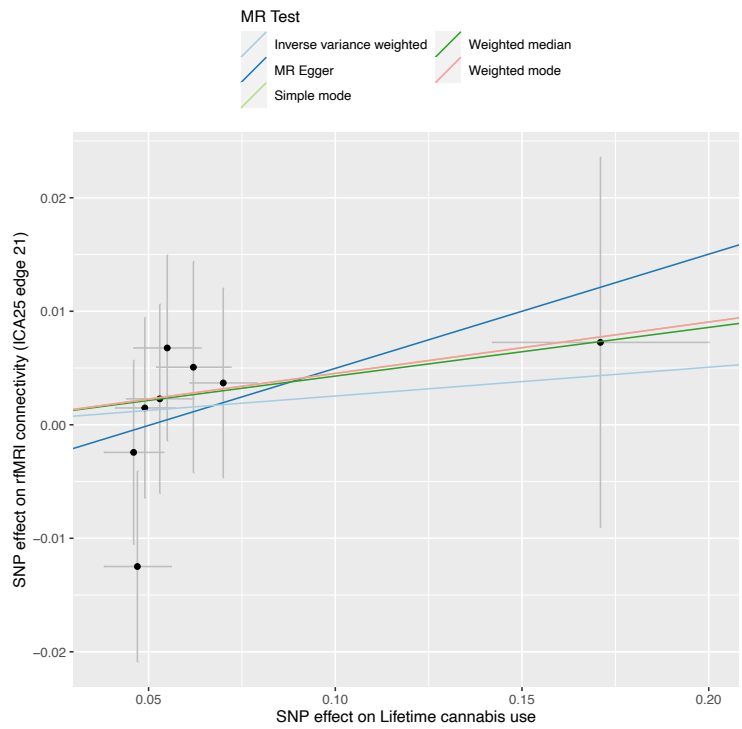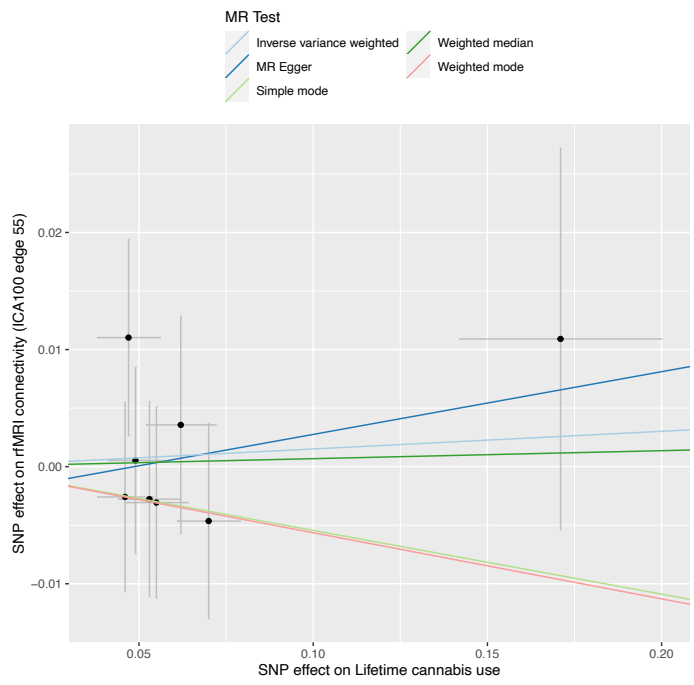

### SFigure 3b: Reverse two-sample linear MR plot for the causal effect of brain measures on Cannabis dependence or abuse

#### Brain measures and Lifetime Cannabis use

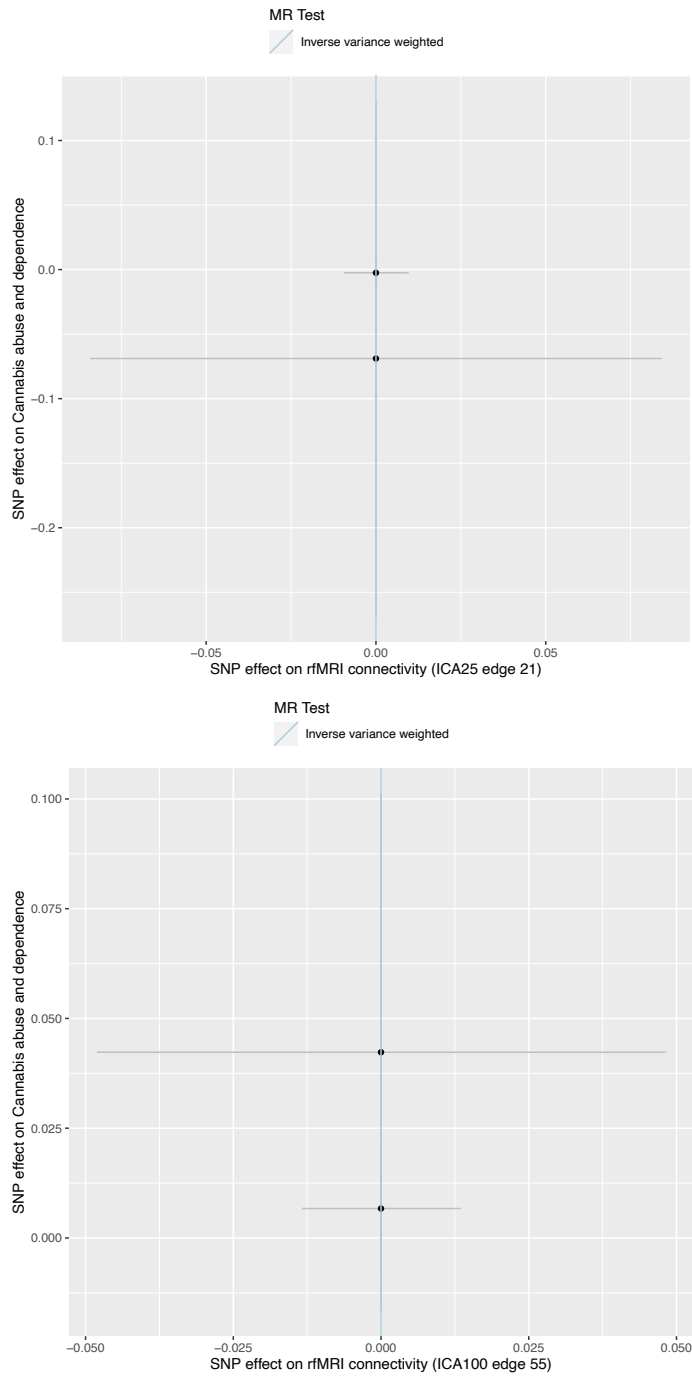

Supplement: bmjment-2024-301065supp001_data_supplement.pdf [file bmjment-2024-301065supp001_data_supplement.pdf]
